# Supplementary material for: Group V Secreted Phospholipase A2 Induces the Release of Proangiogenic and Antiangiogenic Factors by Human Neutrophils
Source: PubMed Central journal article supplement (PMC5394767; doi:10.3389/fimmu.2017.00443), 2017-04-19
Supplement: image_1.pdf [file image_1.pdf]

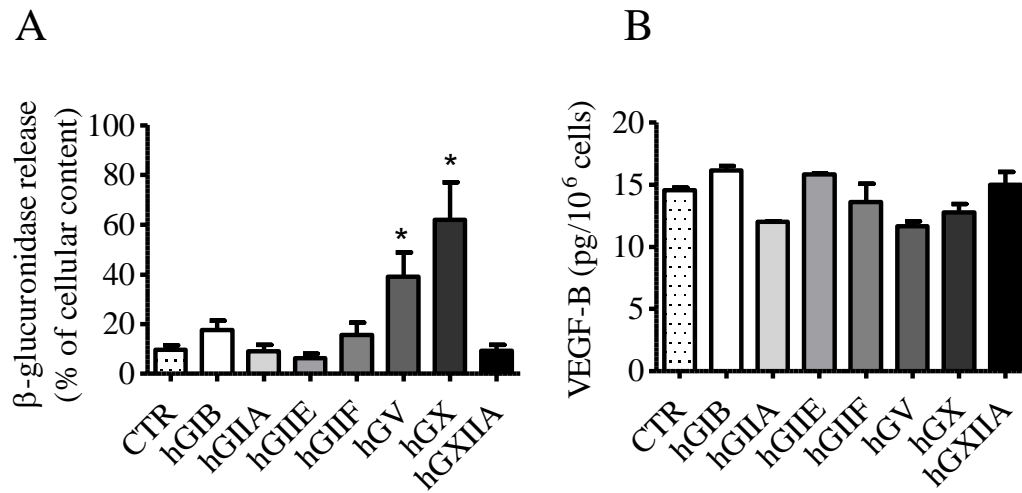

**Supp Figure. 1.**  $\beta$ -glucuronidase and VEGF-B release by sPLA<sub>2</sub>-stimulated PMNs. PMNs were incubated (37°C, 3h) with sPLA<sub>2</sub> (5  $\mu$ g/ml, hGIB, hGIIA, hGIII, hGIIF, hGV, hGX, hGXIIA) or control medium (A-B). At the end of incubation, the supernatants were collected and centrifuged (1000 x g, 4°C, 5 min).  $\beta$ -glucuronidase release (A) was determined by a colorimetric technique and expressed as a percentage of the total cellular content determined in cell aliquots lysed with 0.1% Triton X-100. VEGF-B (B) was determined by ELISA and the values are expressed as pg of VEGF-B per 10<sup>6</sup> cells. The results are the mean  $\pm$  SD of six different preparations of PMNs.\*p<0.05 vs. control.
