# Supplementary material for: Group V Secreted Phospholipase A2 Induces the Release of Proangiogenic and Antiangiogenic Factors by Human Neutrophils
Source: PubMed Central journal article supplement (PMC5394767; doi:10.3389/fimmu.2017.00443), 2017-04-19
Supplement: image_2.pdf [file image_2.pdf]

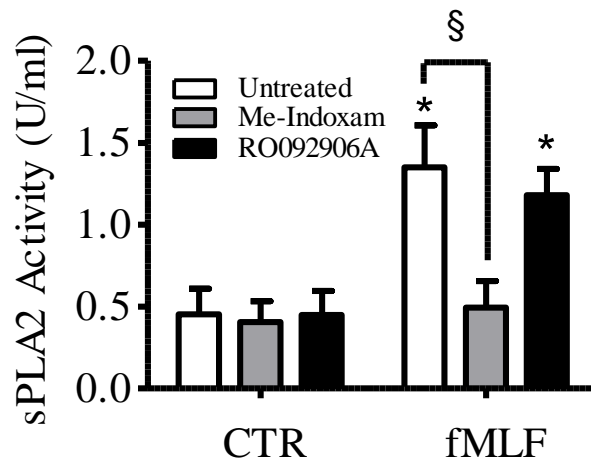

**Supp. Figure 2.** Effect of Me-Indoxam and RO092906A on fMLF-induced sPLA2 release from PMNs. The Cells were pre-incubated (37°C, 15 min) with or without Me-Indoxam and RO092906A (0.1  $\mu$ M), and then stimulated (37°C, 10 min) with fMLF (50 nM). VEGF-A<sub>165b</sub> (A) and CXCL8/IL-8 (B) release was determined by ELISA. Data are the mean  $\pm$  SD of six different preparations of PMNs. \* $p$ <0.05 vs. respective control. §  $p$ <0.05 vs. hGV alone.
