# Supplementary material for: Group V Secreted Phospholipase A2 Induces the Release of Proangiogenic and Antiangiogenic Factors by Human Neutrophils
Source: PubMed Central journal article supplement (PMC5394767; doi:10.3389/fimmu.2017.00443), 2017-04-19
Supplement: table_1.pdf [file table_1.pdf]

**Supplementary Table 1 - Effects of Brefeldin A and Cycloheximide on the release of VEGF-A, CXCL8/IL-8, Ang1 and VEGF-A<sub>165b</sub> from hGV-activated PMNs**

|                     | VEGF-A<br>(pg/10 <sup>6</sup> cells) | CXCL8/IL-8<br>(ng/10 <sup>6</sup> cells) | Ang1<br>(pg/10 <sup>6</sup> cells) | VEGF-A <sub>165b</sub><br>(pg/10 <sup>6</sup> cells) |
|---------------------|--------------------------------------|------------------------------------------|------------------------------------|------------------------------------------------------|
| Untreated           | 21.5±5.5                             | 0.1±0.04                                 | 43.1±12.8                          | 0.0±0.0                                              |
| Brefeldin A         | 18.4±3.8                             | 0.1±0.04                                 | 33.2±9.2                           | 0.0±0.0                                              |
| Cycloheximide       | 18.0±9.6                             | 0.08±0.04                                | 39.0±15.0                          | 0.0±0.0                                              |
| hGV                 | 76.35±15.4                           | 0.39±0.07                                | 166.2±41.8                         | 53.9±8.9                                             |
| hGV +Brefeldin A    | 40.8±17.6*                           | 0.24±0.08*                               | 89.4±9.5*                          | 28.2±2.9*                                            |
| hGV + Cycloheximide | 73.7±31.4                            | 0.31±0.05                                | 178.9±44.0                         | 55.7±6.9                                             |

PMNs were preincubated for 30 min at 37 °C with medium alone (Untreated) or Brefeldin A (10 µg/ml) or Cycloheximide (10 µg/ml) and then were stimulated with hGV (3 µg/ml). At the end of incubation the concentrations of VEGF-A, CXCL8/IL-8, Ang1 and VEGF-A<sub>165b</sub> were evaluated in the supernatants by ELISA.

Data are the mean ± SD of four experiments.

\* p< 0.05 vs. hGV alone
