# Supplementary material for: Group V Secreted Phospholipase A2 Induces the Release of Proangiogenic and Antiangiogenic Factors by Human Neutrophils
Source: PubMed Central journal article supplement (PMC5394767; doi:10.3389/fimmu.2017.00443), 2017-04-19
Supplement: table_2.pdf [file table_2.pdf]

**Supplementary Table 2 - Total level (supernatants plus cellular lysates) of VEGF-A, Ang1 and VEGF-A<sub>165b</sub> in hGV-activated PMNs**

|           | VEGF-A<br>(pg/10 <sup>6</sup> cells) | Ang1<br>(pg/10 <sup>6</sup> cells) | VEGF-A <sub>165b</sub><br>(pg/10 <sup>6</sup> cells) |
|-----------|--------------------------------------|------------------------------------|------------------------------------------------------|
| Untreated | 242.6±34.6                           | 283.5±61.4                         | 261.5±71.5                                           |
| hGV       | 273.4±25.4                           | 354.7±55.8                         | 297.7±98.9                                           |

PMNs were stimulated for 3 hours at 37 °C with medium alone (Untreated) or with hGV (3 µg/ml). At the end of incubation the concentrations of VEGF-A, CXCL8/IL-8, Ang1 and VEGF-A<sub>165b</sub> were evaluated in the supernatants and in cellular lysates by ELISA.

Data are the mean ± SD of four experiments.
